# Supplementary material
Source: publisher figshare collection journal article supplement (https://acs.figshare.com/ndownloader/files/5102941)
Supplement: Supplementary file 1 [file 5102941]

HEADER    PROTEIN
COMPND    cuh2onh3.pdb 
AUTHOR    GENERATED BY BABEL 1.6 
ATOM      1 Cu   UNK     1      -0.256   0.047  -0.009  1.00  0.00 
ATOM      2  O   UNK     1      -2.198   0.162  -0.107  1.00  0.00 
ATOM      3  N   UNK     1       1.672   0.012   0.109  1.00  0.00 
ATOM      4  H   UNK     1       2.107   0.675  -0.543  1.00  0.00 
ATOM      5  H   UNK     1       2.062  -0.913  -0.105  1.00  0.00 
ATOM      6  H   UNK     1       2.004   0.264   1.048  1.00  0.00 
ATOM      7  H   UNK     1      -2.744  -0.281   0.571  1.00  0.00 
ATOM      8  H   UNK     1      -2.646   0.033  -0.964  1.00  0.00 
CONECT    1    2    3
CONECT    2    1    7    8
CONECT    3    1    4    5    6
CONECT    4    3
CONECT    5    3
CONECT    6    3
CONECT    7    2
CONECT    8    2
MASTER        0    0    0    0    0    0    0    0    8    0    8    0
END
